# Supplementary material for: Downregulation of α-Melanocyte-Stimulating Hormone-Induced Activation of the Pax3-MITF-Tyrosinase Axis by Sorghum Ethanolic Extract in B16F10 Melanoma Cells
Source: MDPI journal article supplement (doi:10.3390/ijms19061640), 2018-06-01
Supplement: s1 [file s1]

## Supplementary Material

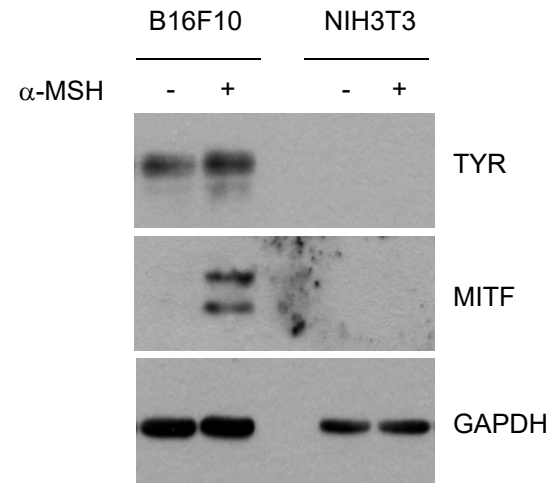

**Supplemental Figure S3.** B16F10 and NIH3T3 fibroblasts cells were treated with either vehicle (DMSO) or 100 nM  $\alpha$ -MSH for 24 h. Cell lysates were subjected to immunoblotting using antibody against TYR or MITF. The GAPDH level was examined as an internal control.
