# Supplementary material for: Downregulation of α-Melanocyte-Stimulating Hormone-Induced Activation of the Pax3-MITF-Tyrosinase Axis by Sorghum Ethanolic Extract in B16F10 Melanoma Cells
Source: MDPI journal article supplement (doi:10.3390/ijms19061640), 2018-06-01
Supplement: s1 [file s1]

## Supplementary Material

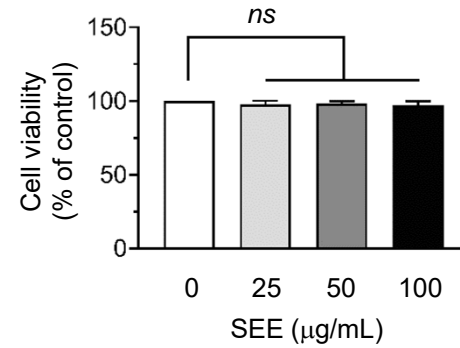

**Supplemental Figure S1.** B16F10 cells were treated with either vehicle (DMSO; 0) or SEE (25, 50, and 100 μg/mL) for 24 h. Cell viabilities were measured using a Cell Counting Kit-8. Data are presented as means  $\pm$  SD ( $n = 3$ ). *ns* denotes not significant.
